# Supplementary material for: Intra-species differences in population size shape life history and genome evolution
Source: eLife. 2020 Sep 1;9:e55794. doi: 10.7554/eLife.55794 (PMC7462614; doi:10.7554/eLife.55794)
Supplement: Supplementary file 1. — Geographical and environmental statistics file 1B. Sequencing and mapping statistics file 1C. Genome-wide genetic differentiation file 1D. FST outlier high genetic differentiation NF414 vs. NF303 file 1E. FST outlier high genetic differentiation NF303 vs. GNP file 1F. FST outlier high genetic differentiation NF414 vs. GNP file 1G. FST outlier low genetic differentiation file 1H. Distribution of fitness effects file 1I. Pathway overrepresentation DoS file 1J. FST outlier genes differentially expressed with age file 1K. Pairwise Wilcoxon rank sum test P values for Consurf score with N. orthonotus as outgroup file 1L. Pairwise Wilcoxon rank sum test P values for Consurf score with N. rachovii as outgroup [file elife-55794-supp1.xlsx]

## Sheet: Index
Index to Supplementary Tables
A	file 1A	Geographical and environmental statistics
B	file 1B	Sequencing and mapping statistics
C	file 1C	Genome-wide genetic differentiation
D	file 1D	FST outlier high genetic differentiation NF414 vs. NF303
E	file 1E	FST outlier high genetic differentiation NF303 vs. GNP
F	file 1F	FST outlier high genetic differentiation NF414 vs. GNP
G	file 1G	FST outlier low genetic differentiation
H	file 1H	Distribution of fitness effects
I	file 1I	Pathway overrepresentation DoS
J	file 1J	FST outlier genes differentially expressed with age
K	file 1K	Pairwise Wilcoxon rank sum test P values for Consurf score with N. orthonotus as outgroup
L	file 1L	Pairwise Wilcoxon rank sum test P values for Consurf score with N. rachovii as outgroup

## Sheet: file1A
file 1A. Geographical and environmental statistics
ID	GNP-G1-3	GNP-G4	NF414	NF303
Species	N. furzeri	N. furzeri	N. furzeri	N. furzeri
Latitude	-21.80	-21.77	-22.55	-24.11
Longitude	31.92	31.88	32.73	32.77
County	Zimbabwe	Zimbabwe	Mozambique	Mozambique
Altitude	332	344	106	68
Annual precipitation (P)	527	545	473	588
Evapotranspiration (PET)	1907	1913	1792	1743
Aridity	0.27635	0.284893	0.263951	0.337349
bio1	234	233	246	242
bio2	136	137	139	142
bio3	62	62	61	59
bio4	2909	2922	3045	3168
bio6	109	108	115	110
bio7	218	218	225	237
bio8	264	264	277	277
bio9	192	191	216	211
bio10	264	264	277	277
bio11	192	191	201	197
bio12	529	538	464	582
bio13	107	108	99	107
bio14	3	3	1	10
bio15	90	91	96	73
bio16	315	321	289	303
bio17	17	18	9	38
bio18	315	321	289	303
bio19	17	18	13	39

## Sheet: file1B
file 1B. Sequencing and mapping statistics
ID	SRA Accession	Species	Latitude	Longitude	County	Female	Male	Library type	Sequencer	Library preparation	Read pairs [in million]	Mean coverage BAM	Mean coverage MPILEUP	Mean coverage filtered MPILEUP
GNP-G1-3	SRR11581571	N. furzeri	-21.80	31.92	Zimbabwe	21	8	150 x2 PE	HiSeq4000	pooled	517.2	55.8	32.1	22.1
GNP-G4	SRR11581570	N. furzeri	-21.77	31.88	Zimbabwe	14	15	150 x2 PE	HiSeq4000	pooled	498.3	58.6	35.4	26.5
NF414	SRR11581568	N. furzeri	-22.55	32.73	Mozambique	15	15	150 x2 PE	HiSeq4000	pooled	418.7	60.9	41.9	38.7
NF303	SRR11581567	N. furzeri	-24.11	32.77	Mozambique	15	15	150 x2 PE	HiSeq4000	pooled	420.7	56.6	37.5	35.1
GNP merged		N. furzeri			Zimbabwe	35	23	150 x2 PE	HiSeq4000	pooled		101.472	61.1	47
GNP4	SRR11581565	N. furzeri	-21.77	31.88	Zimbabwe	-	1	150 x2 PE	Hiseq X	single individual	67.9	13.2	-	-
GNP1_3	SRR11581566	N. furzeri	-21.80	31.92	Zimbabwe	-	1	150 x2 PE	Hiseq X	single individual	106.4	20.8	-	-
NF414_yellow	SRR11581564	N. furzeri	-22.55	32.73	Mozambique	-	1	150 x2 PE	Hiseq X	single individual	55.6	-	-	-
NF414_yellow_2	SRR11581561	N. furzeri	-22.55	32.73	Mozambique	-	1	150 x2 PE	Hiseq X	single individual	27.5	-	-	-
NF414_yellow_merged		N. furzeri	-22.55	32.73	Mozambique	-	1	150 x2 PE	Hiseq X	single individual	83.1	21.5
NF414_red	SRR11581563	N. furzeri	-22.55	32.73	Mozambique	-	1	150 x2 PE	Hiseq X	single individual	36.1	-	-	-
NF414_red_2	SRR11581569	N. furzeri	-22.55	32.73	Mozambique	-	1	150 x2 PE	Hiseq X	single individual	23.8	-
NF414_red_merged		N. furzeri	-22.55	32.73	Mozambique	-	1	150 x2 PE	Hiseq X	single individual	59.9	16.6
NF303	SRR11581562	N. furzeri	-24.11	32.77	Mozambique	-	1	150 x2 PE	Hiseq X	single individual	91.6	18	-	-

## Sheet: file1C
file 1C. Genome-wide genetic differentiation
	GNP-G1-3	GNP-G4	GNP	NF414	NF303
GNP-G1-3	-	0.041	0.029	0.213	0.274
GNP-G4	0.041	-	0.023	0.215	0.274
GNP	0.029	0.023	-	0.201	0.261
NF414	0.213	0.215	0.201	-	0.142
NF303	0.274	0.274	0.261	0.142	-

## Sheet: file1D
file 1D. FST outlier high genetic differentiation NF414 vs. NF303
RefSeqID	Chromosome	FST GNPvsNF414	FST GNPvsNF303	FST NF414vsNF303	Z-transformed FST	Gene symbol	Gene description	HumanEnsemblID
XM_015941178	chr3	0.0760455	0.785571	0.595761	6.08588	LOC107372989	protein-lysine N-methyltransferase EEF2KMT
XM_015941768	chr4	0.107804	0.588017	0.612277	5.87497	insc	inscuteable homolog (Drosophila)
XM_015941863	chr10	0.0425532	0.897063	0.883789	10.428	hibch	3-hydroxyisobutyryl-CoA hydrolase%2C transcript variant X1	ENSG00000198130
XM_015941866	chr10	0.0218853	0.605421	0.603494	10.428	lss	lanosterol synthase (2%2C3-oxidosqualene-lanosterol cyclase)
XM_015941868	chr10	0.0550886	0.798219	0.808749	10.428	LOC107373715	chromosome unknown open reading frame%2C human C2orf88%2C transcript variant X2
XM_015941869	chr10	0.0517419	0.882353	0.771506	10.428	LOC107373716	uncharacterized LOC107373716
XM_015941982	chr10	0.0710941	0.72824	0.660237	5.2565	cops8	COP9 signalosome subunit 8%2C transcript variant X1	ENSG00000198612
XM_015942501	chr4	0.0746269	0.851852	0.763409	5.87497	LOC107374351	protein inscuteable homolog
XM_015944700	chr6	0.130476	0.634587	0.596433	10.7496	slc8a1	solute carrier family 8 member A1%2C transcript variant X2
XM_015946918	chr1	0.117436	0.688016	0.635708	6.61185	phf23	PHD finger protein 23	ENSG00000040633
XM_015966934	chr8	0.0503359	0.739007	0.741087	7.57347	casc3	cancer susceptibility candidate 3	ENSG00000108352,ENSG00000108349
XM_015967972	chr13	0.705902	1	0.719735	5.23771	LOC107390951	transcriptional enhancer factor TEF-5-like
XM_015972986	chr19	0.422819	0.750373	0.584702	6.19136	LOC107394182	solute carrier family 23 member 2-like	ENSG00000089057
XM_015973765	chr12	0.32201	0.643627	0.578101	7.12203	jarid2	jumonji and AT-rich interaction domain containing 2	ENSG00000008083
XM_015974725	chr10	0	1	1	8.8488	LOC107395351	dipeptidyl aminopeptidase-like protein 6%2C transcript variant X1
XM_015976081	chr3	0.0550484	0.653928	0.657439	5.47982	LOC107396381	serine/arginine repetitive matrix protein 2-like	ENSG00000167978
XM_015977084	chr10	0.081834	0.805689	0.639282	6.29221	LOC107397167	growth/differentiation factor 8-like
XM_015977085	chr10	0	0.813517	0.812895	6.29221	LOC107397168	glutathione S-transferase theta-1-like%2C transcript variant X1	ENSG00000099984

## Sheet: file1E
file 1E. FST outlier high genetic differentiation NF303 vs. GNP
RefSeqID	Chromosome	FST GNPvsNF414	FST GNPvsNF303	FST NF414vsNF303	Z-transformed FST	Gene symbol	Gene description	HumanEnsemblID
XM_015941863	chr10	0.0425532	0.897063	0.883789	3.91829	hibch	3-hydroxyisobutyryl-CoA hydrolase%2C transcript variant X1	ENSG00000198130
XM_015944547	chr6	0.533375	0.854345	0.267995	3.75039	inpp5a	inositol polyphosphate-5-phosphatase A

## Sheet: file1F
file 1F. FST outlier high genetic differentiation NF414 vs. GNP
RefSeqID	Chromosome	FST GNPvsNF414	FST GNPvsNF303	FST NF414vsNF303	Z-transformed FST	Gene symbol	Gene description	HumanEnsemblID
XM_015956265	chr5	0.740479	0.460288	0.235449	2.85448	LOC107383550	zinc finger and BTB domain-containing protein 14-like	ENSG00000198081
XM_015964158	chr4	1	0.689679	0.0818039	2.54469	LOC107388594	potassium voltage-gated channel subfamily D member 2-like	ENSG00000184408
XM_015967982	chr13	0.737887	0.501092	0.414118	2.7767	LOC107390959	patatin-like phospholipase domain-containing protein 2	ENSG00000180316

## Sheet: file1G
file 1G. FST outlier low genetic differentiation
0.5th percentile of genetic differentiation between all populations
RefSeqID	Gene symbol	Gene description	HumanEnsemblID
XM_015949386	gdf6	growth differentiation factor 6%2C transcript variant X2
XM_015949383	sybu	syntabulin%2C transcript variant X2
XM_015965805	lcp1	lymphocyte cytosolic protein 1 (L-plastin)	ENSG00000136167
XM_015965807	cnot11	CCR4-NOT transcription complex subunit 11	ENSG00000158435
XM_015965812	LOC107389593	abl interactor 2-like%2C transcript variant X5
1st percentile of genetic differentiation between all populations
RefSeqID	Gene symbol	Gene description	HumanEnsemblID
XM_015940864	LOC107372657	butyrophilin subfamily 2 member A2-like%2C transcript variant X1
XM_015940862	LOC107372655	uncharacterized LOC107372655%2C transcript variant X1
XM_015957072	LOC107384047	sodium channel protein type 8 subunit alpha-like%2C transcript variant X2
XM_015957075	LOC107384048	fidgetin
XM_015972257	hectd4	HECT domain E3 ubiquitin protein ligase 4%2C transcript variant X1	ENSG00000173064
XM_015944666	LOC107375860	arylsulfatase I-like
XM_015944667	LOC107375861	synaptopodin 2-like protein%2C transcript variant X1	ENSG00000166317
XM_015950935	LOC107379975	protein FAM222B-like	ENSG00000173065
XM_015950936	LOC107379976	fructose-bisphosphate aldolase C-like	ENSG00000109107
XM_015950937	LOC107379977	serine/arginine-rich splicing factor 1%2C transcript variant X1	ENSG00000136450
XM_015950939	LOC107379978	dynein light chain 2%2C cytoplasmic

## Sheet: file1H
file 1H. Distribution of fitness effects
Category [4Nes]	GNP	NF414	NF303
< -100	0.1268413 [0.09192682-0.16415135]	0.58365065 [0.5743487-0.5957593]	0.62082351 [0.6105854-0.6309637]
(-100, -10)	0.4151010 [0.3948339-0.4312279]	0.11764077 [0.1075757-0.1236958]	0.09493083 [0.08723946-0.10205726]
(-10, -1)	0.2524761 [0.2336232-0.2737168]	0.08443268 [0.07905414-0.08779710]	0.07116903 [0.06655014-0.07534230]
(-1, 0)	0.2055817 [0.2017539-0.2084295]	0.21427590 [0.2127740-0.2168211]	0.2130766 [0.2112140-0.2154741]
	[Confident intervall]	[Confident intervall]	[Confident intervall]

## Sheet: file1I
file 1I. DoS pathway overrepresentation
<2.5% DoS GNP
p-value	q-value	pathway	source	external_id	members_input_overlap	members_input_overlap_geneids	size	effective_size
3.59323e-06	0.000420408	WNT ligand biogenesis and trafficking	Reactome	R-HSA-3238698	ENSG00000114251; ENSG00000075290; ENSG00000105989; ENSG00000122958	7474; 9559; 7472; 7479	26	6
2.83064e-05	0.00165593	Signaling by WNT	Reactome	R-HSA-195721	ENSG00000113575; ENSG00000105989; ENSG00000114251; ENSG00000196781; ENSG00000122958; ENSG00000075290; ENSG00000105221	7474; 9559; 5515; 7088; 7479; 208; 7472	278	41
0.000110134	0.00322141	Deregulated CDK5 triggers multiple neurodegenerative pathways in Alzheimer,s disease models	Reactome	R-HSA-8862803	ENSG00000164885; ENSG00000176749; ENSG00000177606	3725; 8851; 1020	18	5
0.000110134	0.00322141	Neurodegenerative Diseases	Reactome	R-HSA-8863678	ENSG00000164885; ENSG00000176749; ENSG00000177606	3725; 8851; 1020	18	5
0.000198248	0.00349122	TCF dependent signaling in response to WNT	Reactome	R-HSA-201681	ENSG00000114251; ENSG00000113575; ENSG00000075290; ENSG00000196781; ENSG00000105221	7474; 5515; 7088; 208; 7479	190	25
0.000471641	0.00689775	Class B/2 (Secretin family receptors)	Reactome	R-HSA-373080	ENSG00000114251; ENSG00000122679; ENSG00000105989; ENSG00000075290	7474; 7472; 10268; 7479	96	17
0.00167899	0.0159794	Signaling pathways regulating pluripotency of stem cells - Homo sapiens (human)	KEGG	path:hsa04550	ENSG00000114251; ENSG00000075290; ENSG00000105989; ENSG00000119715; ENSG00000105221	2103; 208; 7472; 7474; 7479	139	39
0.00167899	0.0159794	Breast cancer - Homo sapiens (human)	KEGG	path:hsa05224	ENSG00000114251; ENSG00000075290; ENSG00000105221; ENSG00000105989; ENSG00000177606	3725; 208; 7472; 7474; 7479	147	39
0.00188542	0.0159794	mTOR signaling pathway - Homo sapiens (human)	KEGG	path:hsa04150	ENSG00000114251; ENSG00000116039; ENSG00000075290; ENSG00000105989; ENSG00000105221	525; 208; 7472; 7474; 7479	151	40
0.00218522	0.0159794	Wnt signaling pathway - Homo sapiens (human)	KEGG	path:hsa04310	ENSG00000114251; ENSG00000075290; ENSG00000105989; ENSG00000177606	3725; 7472; 7474; 7479	149	25
0.00261664	0.0180086	Hippo signaling pathway - Homo sapiens (human)	KEGG	path:hsa04390	ENSG00000114251; ENSG00000113575; ENSG00000213639; ENSG00000105989; ENSG00000075290	7472; 7474; 7479; 5500; 5515	154	43
0.00404941	0.023689	Proteoglycans in cancer - Homo sapiens (human)	KEGG	path:hsa05205	ENSG00000160293; ENSG00000105989; ENSG00000114251; ENSG00000213639; ENSG00000105221; ENSG00000075290	7474; 208; 7410; 7472; 7479; 5500	201	68
0.00425378	0.0236996	Basal cell carcinoma - Homo sapiens (human)	KEGG	path:hsa05217	ENSG00000114251; ENSG00000105989; ENSG00000075290	7472; 7474; 7479	63	15
0.00515075	0.0251099	B cell receptor signaling pathway - Homo sapiens (human)	KEGG	path:hsa04662	ENSG00000105221; ENSG00000160293; ENSG00000177606	3725; 208; 7410	71	16
0.00929526	0.0388409	Gastric cancer - Homo sapiens (human)	KEGG	path:hsa05226	ENSG00000114251; ENSG00000075290; ENSG00000105989; ENSG00000105221	208; 7472; 7474; 7479	149	37
0.00982484	0.0396382	Cocaine addiction - Homo sapiens (human)	KEGG	path:hsa05030	ENSG00000164885; ENSG00000176749; ENSG00000177606	3725; 8851; 1020	49	20
>97.5% DoS GNP
p-value	q-value	pathway	source	external_id	members_input_overlap	members_input_overlap_geneids	size	effective_size
0.000396678	0.00158671	Cytokine-cytokine receptor interaction - Homo sapiens (human)	KEGG	path:hsa04060	ENSG00000164509; ENSG00000107562; ENSG00000136634; ENSG00000026103	3586; 355; 133396; 6387	294	42
<2.5% DoS NF414
p-value	q-value	pathway	source	external_id	members_input_overlap	members_input_overlap_geneids	size	effective_size
0.001839	0.0557143	SRP-dependent cotranslational protein targeting to membrane	Reactome	R-HSA-1799339	ENSG00000163902; ENSG00000108298; ENSG00000116251; ENSG00000118363	9789; 6143; 6184; 6146	124	30
0.00364215	0.0557143	Cap-dependent Translation Initiation	Reactome	R-HSA-72737	ENSG00000119718; ENSG00000108298; ENSG00000116251; ENSG00000100353	8664; 8892; 6143; 6146	133	36
0.00364215	0.0557143	Eukaryotic Translation Initiation	Reactome	R-HSA-72613	ENSG00000119718; ENSG00000108298; ENSG00000116251; ENSG00000100353	8664; 8892; 6143; 6146	133	36
0.00435402	0.0559802	Tacrolimus/Cyclosporine Pathway, Pharmacodynamics	PharmGKB	PA165985892	ENSG00000140044; ENSG00000171223; ENSG00000204103	3726; 122953; 9935	44	19
>97.5% DoS NF414
p-value	q-value	pathway	source	external_id	members_input_overlap	members_input_overlap_geneids	size	effective_size
0.00044297	0.0184111	Type I diabetes mellitus - Homo sapiens (human)	KEGG	path:hsa04940	ENSG00000136750; ENSG00000117560; ENSG00000178562	2572; 940; 356	43	11
0.00058448	0.0184111	Autoimmune thyroid disease - Homo sapiens (human)	KEGG	path:hsa05320	ENSG00000165409; ENSG00000117560; ENSG00000178562	940; 356; 7253	53	12
0.00355858	0.0747301	rRNA processing	Reactome	R-HSA-72312	ENSG00000136718; ENSG00000156697; ENSG00000173113; ENSG00000171861	55178; 10813; 51504; 92856	65	44
0.00813361	0.102484	RNA Polymerase II Transcription Elongation	Reactome	R-HSA-75955	ENSG00000188342; ENSG00000140395; ENSG00000188986	25920; 2963; 80349	65	29
0.00813361	0.102484	Formation of RNA Pol II elongation complex	Reactome	R-HSA-112382	ENSG00000188342; ENSG00000140395; ENSG00000188986	25920; 2963; 80349	65	29
<2.5% DoS NF303
-
>97.5% DoS NF303
p-value	q-value	pathway	source	external_id	members_input_overlap	members_input_overlap_geneids	size	effective_size
0.00349608	0.0147299	Mitochondrial translation initiation	Reactome	R-HSA-5368286	ENSG00000136522; ENSG00000131368; ENSG00000125445	64432; 51081; 57129	89	51
0.00369487	0.0147299	Mitochondrial translation termination	Reactome	R-HSA-5419276	ENSG00000136522; ENSG00000131368; ENSG00000125445	64432; 51081; 57129	89	52
0.00369487	0.0147299	Mitochondrial translation elongation	Reactome	R-HSA-5389840	ENSG00000136522; ENSG00000131368; ENSG00000125445	64432; 51081; 57129	89	52
0.00390046	0.0147299	Respiratory electron transport, ATP synthesis by chemiosmotic coupling, and heat production by uncoupling proteins.	Reactome	R-HSA-163200	ENSG00000123545; ENSG00000147123; ENSG00000154723	522; 54539; 29078	123	53
0.00433233	0.0147299	Mitochondrial translation	Reactome	R-HSA-5368287	ENSG00000136522; ENSG00000131368; ENSG00000125445	64432; 51081; 57129	95	55

[truncated: 3 more sheets: file1J, file1K, file1L]
